# Supplementary material for: Quantitative Proteomics and Lipidomics Analysis of Endoplasmic Reticulum of Macrophage Infected with Mycobacterium tuberculosis
Source: PubMed Central journal article supplement (PMC4345262; doi:10.1155/2015/270438), 2015-02-16
Supplement: 270438.f1.pdf [file 270438.f1.pdf]

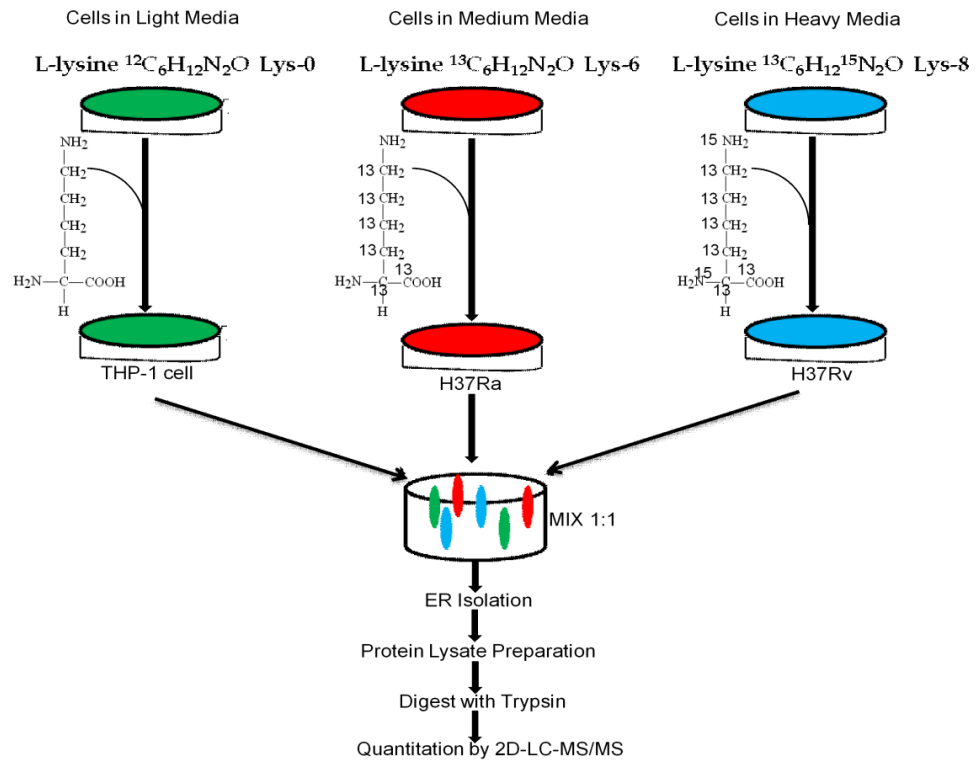

SUPPLEMENTARY FIGURE 1

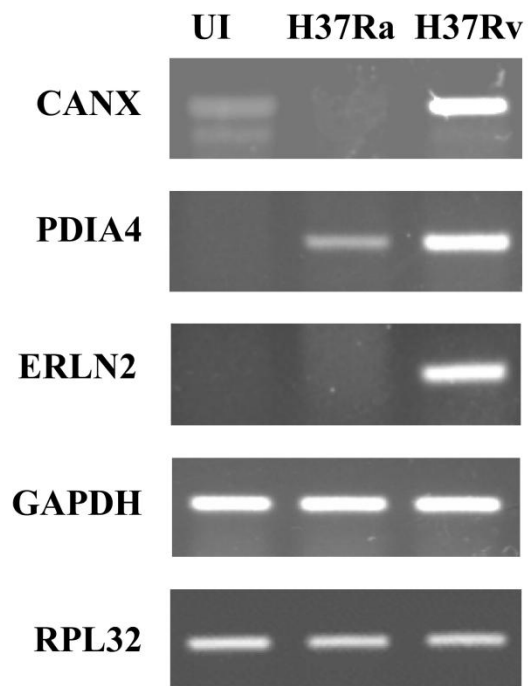

SUPPLEMENTARY FIGURE-2

| S.No | Unused ProtScore | Coverage % | Gene ID_Accession Number |
|------|------------------|------------|--------------------------|
| 1    | 49.3             | 56.1       | P11021                   |
| 2    | 35.24            | 46.1       | P07237                   |
| 3    | 32.18            | 36.7       | P14625                   |
| 4    | 29.92            | 49.5       | P30101                   |
| 5    | 29.49            | 61.9       | P27797                   |
| 6    | 28.34            | 53.6       | P04222                   |
| 7    | 25.56            | 31.6       | Q14697                   |
| 8    | 22.75            | 37.6       | P04843                   |
| 9    | 19.54            | 50.4       | P01892                   |
| 10   | 15.38            | 30.2       | P27824                   |
| 11   | 14.53            | 36.8       | Q15084                   |
| 12   | 12.75            | 19.7       | Q9Y4L1                   |
| 13   | 12.55            | 21.6       | P04844                   |
| 14   | 12.28            | 25.9       | P13667                   |
| 15   | 12.23            | 38.4       | P23284                   |
| 16   | 12.02            | 20.4       | Q02809                   |
| 17   | 11.66            | 35.1       | P27635                   |
| 18   | 10.79            | 26.6       | P23141                   |
| 19   | 10.32            | 27.1       | P14314                   |
| 20   | 8.8              | 28         | Q03518                   |
| 21   | 8.72             | 24.1       | Q9UBR2                   |
| 22   | 8.46             | 27.3       | Q13501                   |
| 23   | 8.32             | 30.8       | O15533                   |
| 24   | 7.95             | 22.8       | O60506                   |
| 25   | 6.77             | 37.6       | O00560                   |
| 26   | 6.2              | 7.6        | Q9NQC3                   |
| 27   | 5.62             | 15.2       | P16615                   |
| 28   | 5.38             | 29.3       | O75396                   |
| 29   | 5.34             | 27.5       | Q99541                   |
| 30   | 5.23             | 23.1       | Q32P28                   |
| 31   | 5.22             | 17.1       | P49768                   |
| 32   | 5.18             | 15.5       | P08240                   |
| 33   | 5.14             | 19.1       | Q8NBJ5                   |
| 34   | 5.06             | 14.5       | P49257                   |
| 35   | 4.94             | 15         | Q8TCJ2                   |
| 36   | 4.92             | 17.4       | Q6PJF5                   |
| 37   | 4.88             | 18         | P39656                   |
| 38   | 4.88             | 24.1       | Q9BS26                   |
| 39   | 4.77             | 16         | P20591                   |
| 40   | 4.74             | 18.2       | O15260                   |
| 41   | 4.48             | 11.2       | Q8IV08                   |
| 42   | 4.36             | 23.2       | P13674                   |
| 43   | 4.34             | 27.4       | P27695                   |
| 44   | 4.27             | 30         | P30533                   |
| 45   | 4.24             | 18.5       | Q13724                   |
| 46   | 4                | 28.1       | P09601                   |
| 47   | 4                | 27.4       | P51151                   |
| 48   | 3.94             | 21.4       | Q12907                   |
| 49   | 3.94             | 20.7       | Q96CS3                   |

|    |      |      |        |
|----|------|------|--------|
| 50 | 3.82 | 13.2 | Q9UBV2 |
| 51 | 3.8  | 13.2 | Q9BUN8 |
| 52 | 3.65 | 34.9 | Q9UBS4 |
| 53 | 3.51 | 13.3 | P43307 |
| 54 | 3.51 | 27.1 | P60468 |
| 55 | 3.51 | 9.6  | Q14534 |
| 56 | 3.51 | 21   | Q9BTV4 |
| 57 | 3.48 | 40.1 | Q9Y2B0 |
| 58 | 3.35 | 23.6 | O75340 |
| 59 | 3.27 | 18.3 | O75844 |
| 60 | 3.22 | 25.4 | Q15293 |
| 61 | 3.15 | 9.5  | P46977 |
| 62 | 3.07 | 20.7 | P16435 |
| 63 | 2.88 | 23.6 | P61019 |
| 64 | 2.88 | 24.5 | Q6RW13 |
| 65 | 2.81 | 19.8 | Q9Y385 |
| 66 | 2.63 | 13.3 | O94905 |
| 67 | 2.63 | 12.4 | Q15005 |
| 68 | 2.56 | 25.4 | O43852 |
| 69 | 2.47 | 11.5 | O60568 |
| 70 | 2.46 | 10.2 | Q9NZ08 |
| 71 | 2.41 | 10.3 | Q15437 |
| 72 | 2.36 | 28   | P50454 |
| 73 | 2.31 | 12.8 | O43865 |
| 74 | 2.26 | 8.1  | Q9NZ01 |
| 75 | 2.22 | 23.9 | Q96HY6 |
| 76 | 2.21 | 12.9 | Q14257 |
| 77 | 2.15 | 8.7  | Q7Z2K6 |
| 78 | 2.1  | 17.4 | Q969V3 |
| 79 | 2.09 | 18.3 | Q01105 |
| 80 | 2.08 | 11.2 | Q9H1C4 |
| 81 | 2.05 | 25.6 | Q86UE4 |
| 82 | 2.04 | 14.7 | Q14573 |
| 83 | 2.03 | 37.4 | P49755 |
| 84 | 2.02 | 20.4 | Q15363 |
| 85 | 2.02 | 7.9  | Q96HE7 |
| 86 | 2    | 8.6  | Q14165 |
| 87 | 2    | 11.9 | Q3Zaq7 |
| 88 | 2    | 7.9  | Q6DD88 |
| 89 | 2    | 33.3 | Q8WUD1 |
| 90 | 2    | 16.3 | Q96AG4 |
| 91 | 2    | 10.2 | Q9UL25 |
| 92 | 2    | 11.9 | Q9UNL2 |
| 93 | 1.86 | 5.6  | Q8TCT9 |
| 94 | 1.71 | 10   | O95479 |
| 95 | 1.59 | 6.1  | Q92643 |
| 96 | 1.51 | 7.4  | A5PLL7 |
| 97 | 1.43 | 12.7 | Q9NYU2 |
| 98 | 1.38 | 10.1 | Q15436 |
| 99 | 1.34 | 5    | O95197 |

|     |      |      |        |
|-----|------|------|--------|
| 100 | 1.24 | 10.7 | O95433 |
| 101 | 1.23 | 19.8 | Q9P2E9 |
| 102 | 1.16 | 7.8  | P61619 |
| 103 | 1.15 | 14.8 | Q9BVC6 |
| 104 | 1.12 | 8.6  | P37268 |
| 105 | 1.09 | 6.5  | P53992 |
| 106 | 1.07 | 10.4 | Q8N5M9 |
| 107 | 1.05 | 14.6 | O94874 |
| 108 | 1.05 | 13   | Q9Y3B3 |
| 109 | 1.02 | 10.8 | Q13438 |
| 110 | 1    | 10.2 | P23219 |
| 111 | 0.98 | 10.7 | Q9H3N1 |
| 112 | 0.98 | 9.6  | Q8NF37 |
| 113 | 0.96 | 4.7  | P49810 |
| 114 | 0.81 | 26.4 | Q9BVK6 |
| 115 | 0.78 | 4    | P55735 |
| 116 | 0.76 | 5.2  | Q96DZ1 |
| 117 | 0.73 | 8.8  | Q9BVG9 |
| 118 | 0.67 | 18   | Q13190 |
| 119 | 0.63 | 20.5 | O00264 |
| 120 | 0.61 | 12.1 | Q12797 |
| 121 | 0.6  | 5.1  | P48651 |
| 122 | 0.51 | 7.8  | Q14643 |
| 123 | 0.51 | 14.1 | Q96S52 |
| 124 | 0.49 | 4.9  | P48723 |
| 125 | 0.47 | 7.6  | Q9NQW1 |
| 126 | 0.44 | 2.9  | Q6PIU2 |
| 127 | 0.4  | 14.9 | Q9P035 |
| 128 | 0.39 | 17.3 | Q9Y5M8 |
| 129 | 0.35 | 19   | P67812 |
| 130 | 0.34 | 22.2 | Q9HCN8 |
| 131 | 0.3  | 10.4 | Q8N2G8 |
| 132 | 0.29 | 17.8 | Q9UNK0 |
| 133 | 0.24 | 23.9 | Q9P2X0 |

**Supplementary Table-1**

**ND- Not detected**

**ER- Endoplasmic reticulum**

**Gene Name**

**GRP78**

**PDIA1**

**ENPL**

**PDIA3**

**CALR**

**1C03**

**GANAB**

**RPN1**

**1A02**

**CALX**

**PDIA6**

**HYOU1**

**RPN2**

**PDIA4**

**PPIB**

**PLOD1**

**RL10**

**EST1**

**GLU2B**

**TAP1**

**CATZ**

**SQSTM**

**TPSN**

**HNRPQ**

**SDCB1**

**RTN4**

**AT2A2**

**SC22B**

**PLIN2**

**P3H1**

**PSN1**

**SRPR**

**GT251**

**LMAN1**

**STT3B**

**RHDF2**

**OST48**

**ERP44**

**MX1**

**SURF4**

**PLD3**

**P4HA1**

**APEX1**

**AMRP**

**MOGS**

**HMOX1**

**RAB9A**

**LMAN2**

**FAF2**

SE1L1  
DERL1  
DJB11  
SSRA  
SC61B  
ERG1  
TMM43  
CNPY2  
PDCD6  
FACE1  
RCN1  
STT3A  
NCPR  
RAB2A  
ATRAP  
UB2J1  
ERLN2  
SPCS2  
CALU  
PLOD3  
ERAP1  
SC23B  
SERPH  
SAHH2  
TECR  
DDRGK  
RCN2  
ERMP1  
NCLN  
SET  
UN93B  
LYRIC  
ITPR3  
TMEDA  
TMED2  
ERO1A  
MLEC  
VMA21  
ATLA3  
RAB2B  
LRC59  
RAB21  
SSRG  
HM13  
G6PE  
GPI8  
TM189  
UGGG1  
SC23A  
RTN3

AHSA1  
RRBP1  
S61A1  
TM109  
FDFT  
SC24C  
JAGN1  
UFL1  
TMED7  
OS9  
PGH1  
TMX1  
PCAT1  
PSN2  
TMED9  
SEC13  
ERLEC  
PTSS2  
STX5  
PGRC1  
ASPH  
PTSS1  
ITPR1  
PIGS  
HSP13  
SC31B  
NCEH1  
HACD3  
SRPRB  
SC11A  
SDF2L  
GHDC  
STX8  
DPM3



## Protein ID

78 kDa glucose-regulated protein OS=Homo sapiens GN=HSPA5 PE=1 SV=2

Protein disulfide-isomerase OS=Homo sapiens GN=P4HB PE=1 SV=3

Endoplasmic reticulum chaperone protein OS=Homo sapiens GN=HSP90B1 PE=1 SV=1

Protein disulfide-isomerase A3 OS=Homo sapiens GN=PDIA3 PE=1 SV=4

Calreticulin OS=Homo sapiens GN=CALR PE=1 SV=1

HLA class I histocompatibility antigen, Cw-3 alpha chain OS=Homo sapiens GN=HLA-C PE=1 SV=2

Neutral alpha-glucosidase AB OS=Homo sapiens GN=GANAB PE=1 SV=3

Dolichyl-diphosphooligosaccharide--protein glycosyltransferase subunit 1 OS=Homo sapiens GN=RPN1 PE=1

HLA class I histocompatibility antigen, A-2 alpha chain OS=Homo sapiens GN=HLA-A PE=1 SV=1

Calnexin OS=Homo sapiens GN=CANX PE=1 SV=2

Protein disulfide-isomerase A6 OS=Homo sapiens GN=PDIA6 PE=1 SV=1

Hypoxia up-regulated protein 1 OS=Homo sapiens GN=HYOU1 PE=1 SV=1

Dolichyl-diphosphooligosaccharide--protein glycosyltransferase subunit 2 OS=Homo sapiens GN=RPN2 PE=1

Protein disulfide-isomerase A4 OS=Homo sapiens GN=PDIA4 PE=1 SV=2

Peptidyl-prolyl cis-trans isomerase B OS=Homo sapiens GN=PIIB PE=1 SV=2

Procollagen-lysine,2-oxoglutarate 5-dioxygenase 1 OS=Homo sapiens GN=PLOD1 PE=1 SV=2

60S ribosomal protein L10 OS=Homo sapiens GN=RPL10 PE=1 SV=4

Liver carboxylesterase 1 OS=Homo sapiens GN=CES1 PE=1 SV=2

Glucosidase 2 subunit beta OS=Homo sapiens GN=PRKCSH PE=1 SV=2

Antigen peptide transporter 1 OS=Homo sapiens GN=TAP1 PE=1 SV=2

Cathepsin Z OS=Homo sapiens GN=CTSZ PE=1 SV=1

Sequestosome-1 OS=Homo sapiens GN=SQSTM1 PE=1 SV=1

Tapasin OS=Homo sapiens GN=TAPBP PE=1 SV=1

Heterogeneous nuclear ribonucleoprotein Q OS=Homo sapiens GN=SYNCRIP PE=1 SV=2

Syntenin-1 OS=Homo sapiens GN=SDCBP PE=1 SV=1

Reticulon-4 OS=Homo sapiens GN=RTN4 PE=1 SV=2

Sarcoplasmic/endoplasmic reticulum calcium ATPase 2 OS=Homo sapiens GN=ATP2A2 PE=1 SV=1

Vesicle-trafficking protein SEC22b OS=Homo sapiens GN=SEC22B PE=1 SV=4

Perilipin-2 OS=Homo sapiens GN=PLIN2 PE=1 SV=2

Prolyl 3-hydroxylase 1 OS=Homo sapiens GN=LEPRE1 PE=1 SV=2

Presenilin-1 OS=Homo sapiens GN=PSEN1 PE=1 SV=1

Signal recognition particle receptor subunit alpha OS=Homo sapiens GN=SRPR PE=1 SV=2

Procollagen galactosyltransferase 1 OS=Homo sapiens GN=GLT25D1 PE=1 SV=1

Protein ERGIC-53 OS=Homo sapiens GN=LMAN1 PE=1 SV=2

Dolichyl-diphosphooligosaccharide--protein glycosyltransferase subunit STT3B OS=Homo sapiens GN=STT3B

Inactive rhomboid protein 2 OS=Homo sapiens GN=RHBDF2 PE=1 SV=2

Dolichyl-diphosphooligosaccharide--protein glycosyltransferase 48 kDa subunit OS=Homo sapiens GN=DDO1

Endoplasmic reticulum resident protein 44 OS=Homo sapiens GN=ERP44 PE=1 SV=1

Interferon-induced GTP-binding protein Mx1 OS=Homo sapiens GN=MX1 PE=1 SV=4

Surfeit locus protein 4 OS=Homo sapiens GN=SURF4 PE=1 SV=3

Phospholipase D3 OS=Homo sapiens GN=PLD3 PE=1 SV=1

Prolyl 4-hydroxylase subunit alpha-1 OS=Homo sapiens GN=P4HA1 PE=1 SV=2

DNA-(apurinic or apyrimidinic site) lyase OS=Homo sapiens GN=APEX1 PE=1 SV=2

Alpha-2-macroglobulin receptor-associated protein OS=Homo sapiens GN=LRPAP1 PE=1 SV=1

Mannosyl-oligosaccharide glucosidase OS=Homo sapiens GN=MOGS PE=1 SV=5

Heme oxygenase 1 OS=Homo sapiens GN=HMOX1 PE=1 SV=1

Ras-related protein Rab-9A OS=Homo sapiens GN=RAB9A PE=1 SV=1

Vesicular integral-membrane protein VIP36 OS=Homo sapiens GN=LMAN2 PE=1 SV=1

FAS-associated factor 2 OS=Homo sapiens GN=FAF2 PE=1 SV=2

Protein sel-1 homolog 1 OS=Homo sapiens GN=SEL1L PE=1 SV=3  
Derlin-1 OS=Homo sapiens GN=DERL1 PE=1 SV=1  
DnaJ homolog subfamily B member 11 OS=Homo sapiens GN=DNAJB11 PE=1 SV=1  
Translocon-associated protein subunit alpha OS=Homo sapiens GN=SSR1 PE=1 SV=3  
Protein transport protein Sec61 subunit beta OS=Homo sapiens GN=SEC61B PE=1 SV=2  
Squalene monooxygenase OS=Homo sapiens GN=SQLE PE=2 SV=3  
Transmembrane protein 43 OS=Homo sapiens GN=TMEM43 PE=1 SV=1  
**Protein canopy homolog 2 OS=Homo sapiens GN=CNPY2 PE=1 SV=1**  
Programmed cell death protein 6 OS=Homo sapiens GN=PDCD6 PE=1 SV=1  
**CAAX prenyl protease 1 homolog OS=Homo sapiens GN=ZMPSTE24 PE=1 SV=2**  
Reticulocalbin-1 OS=Homo sapiens GN=RCN1 PE=1 SV=1  
Dolichyl-diphosphooligosaccharide--protein glycosyltransferase subunit STT3A OS=Homo sapiens GN=STT3A PE=1 SV=1  
NADPH--cytochrome P450 reductase OS=Homo sapiens GN=POR PE=1 SV=2  
Ras-related protein Rab-2A OS=Homo sapiens GN=RAB2A PE=1 SV=1  
Type-1 angiotensin II receptor-associated protein OS=Homo sapiens GN=AGTRAP PE=1 SV=1  
Ubiquitin-conjugating enzyme E2 J1 OS=Homo sapiens GN=UBE2J1 PE=1 SV=2  
**Erlin-2 OS=Homo sapiens GN=ERLIN2 PE=1 SV=1**  
Signal peptidase complex subunit 2 OS=Homo sapiens GN=SPCS2 PE=1 SV=3  
Calumenin OS=Homo sapiens GN=CALU PE=1 SV=2  
Procollagen-lysine,2-oxoglutarate 5-dioxygenase 3 OS=Homo sapiens GN=PLOD3 PE=1 SV=1  
Endoplasmic reticulum aminopeptidase 1 OS=Homo sapiens GN=ERAP1 PE=1 SV=3  
Protein transport protein Sec23B OS=Homo sapiens GN=SEC23B PE=1 SV=2  
Serpine H1 OS=Homo sapiens GN=SERPINH1 PE=1 SV=2  
Putative adenosylhomocysteinase 2 OS=Homo sapiens GN=AHCYL1 PE=1 SV=2  
Trans-2,3-enoyl-CoA reductase OS=Homo sapiens GN=TECR PE=1 SV=1  
DDRGK domain-containing protein 1 OS=Homo sapiens GN=DDRGK1 PE=1 SV=2  
Reticulocalbin-2 OS=Homo sapiens GN=RCN2 PE=1 SV=1  
Endoplasmic reticulum metalloproteinase 1 OS=Homo sapiens GN=ERMP1 PE=1 SV=2  
Nicalin OS=Homo sapiens GN=NCLN PE=1 SV=2  
Protein SET OS=Homo sapiens GN=SET PE=1 SV=3  
Protein unc-93 homolog B1 OS=Homo sapiens GN=UNC93B1 PE=1 SV=2  
Protein LYRIC OS=Homo sapiens GN=MTDH PE=1 SV=2  
Inositol 1,4,5-trisphosphate receptor type 3 OS=Homo sapiens GN=ITPR3 PE=1 SV=2  
**Transmembrane emp24 domain-containing protein 10 OS=Homo sapiens GN=TMED10 PE=1 SV=2**  
Transmembrane emp24 domain-containing protein 2 OS=Homo sapiens GN=TMED2 PE=1 SV=1  
ERO1-like protein alpha OS=Homo sapiens GN=ERO1L PE=1 SV=2  
Malectin OS=Homo sapiens GN=MLEC PE=1 SV=1  
Vacuolar ATPase assembly integral membrane protein VMA21 OS=Homo sapiens GN=VMA21 PE=1 SV=1  
Atlastin-3 OS=Homo sapiens GN=ATL3 PE=1 SV=1  
Ras-related protein Rab-2B OS=Homo sapiens GN=RAB2B PE=1 SV=1  
Leucine-rich repeat-containing protein 59 OS=Homo sapiens GN=LRRC59 PE=1 SV=1  
Ras-related protein Rab-21 OS=Homo sapiens GN=RAB21 PE=1 SV=3  
Translocon-associated protein subunit gamma OS=Homo sapiens GN=SSR3 PE=1 SV=1  
Minor histocompatibility antigen H13 OS=Homo sapiens GN=HM13 PE=1 SV=1  
GDH/6PGL endoplasmic bifunctional protein OS=Homo sapiens GN=H6PD PE=1 SV=2  
GPI-anchor transamidase OS=Homo sapiens GN=PIGK PE=1 SV=2  
Transmembrane protein 189 OS=Homo sapiens GN=TMEM189 PE=2 SV=3  
UDP-glucose:glycoprotein glucosyltransferase 1 OS=Homo sapiens GN=UGGT1 PE=1 SV=3  
**Protein transport protein Sec23A OS=Homo sapiens GN=SEC23A PE=1 SV=2**  
Reticulon-3 OS=Homo sapiens GN=RTN3 PE=1 SV=2

Activator of 90 kDa heat shock protein ATPase homolog 1 OS=Homo sapiens GN=AHSA1 PE=1 SV=1  
Ribosome-binding protein 1 OS=Homo sapiens GN=RRBP1 PE=1 SV=4  
Protein transport protein Sec61 subunit alpha isoform 1 OS=Homo sapiens GN=SEC61A1 PE=1 SV=2  
Transmembrane protein 109 OS=Homo sapiens GN=TMEM109 PE=1 SV=1  
Squalene synthase OS=Homo sapiens GN=FDFT1 PE=1 SV=1  
Protein transport protein Sec24C OS=Homo sapiens GN=SEC24C PE=1 SV=3  
Protein jagunal homolog 1 OS=Homo sapiens GN=JAGN1 PE=1 SV=1  
E3 UFM1-protein ligase 1 OS=Homo sapiens GN=UFL1 PE=1 SV=2  
Transmembrane emp24 domain-containing protein 7 OS=Homo sapiens GN=TMED7 PE=1 SV=2  
Protein OS-9 OS=Homo sapiens GN=OS9 PE=1 SV=1  
Prostaglandin G/H synthase 1 OS=Homo sapiens GN=PTGS1 PE=1 SV=2  
Thioredoxin-related transmembrane protein 1 OS=Homo sapiens GN=TMX1 PE=1 SV=1  
Lysophosphatidylcholine acyltransferase 1 OS=Homo sapiens GN=LPCAT1 PE=1 SV=2  
Presenilin-2 OS=Homo sapiens GN=PSEN2 PE=1 SV=1  
Transmembrane emp24 domain-containing protein 9 OS=Homo sapiens GN=TMED9 PE=1 SV=2  
Protein SEC13 homolog OS=Homo sapiens GN=SEC13 PE=1 SV=3  
Endoplasmic reticulum lectin 1 OS=Homo sapiens GN=ERLEC1 PE=1 SV=1  
Phosphatidylserine synthase 2 OS=Homo sapiens GN=PTDSS2 PE=1 SV=1  
Syntaxin-5 OS=Homo sapiens GN=STX5 PE=1 SV=2  
Membrane-associated progesterone receptor component 1 OS=Homo sapiens GN=PGRMC1 PE=1 SV=3  
Aspartyl/asparaginyl beta-hydroxylase OS=Homo sapiens GN=ASPH PE=1 SV=3  
Phosphatidylserine synthase 1 OS=Homo sapiens GN=PTDSS1 PE=1 SV=1  
Inositol 1,4,5-trisphosphate receptor type 1 OS=Homo sapiens GN=ITPR1 PE=1 SV=2  
GPI transamidase component PIG-S OS=Homo sapiens GN=PIGS PE=1 SV=3  
Heat shock 70 kDa protein 13 OS=Homo sapiens GN=HSPA13 PE=1 SV=1  
Protein transport protein Sec31B OS=Homo sapiens GN=SEC31B PE=1 SV=1  
Neutral cholesterol ester hydrolase 1 OS=Homo sapiens GN=NCEH1 PE=1 SV=3  
3-hydroxyacyl-CoA dehydratase 3 OS=Homo sapiens GN=PTPLAD1 PE=1 SV=2  
Signal recognition particle receptor subunit beta OS=Homo sapiens GN=SRPRB PE=1 SV=3  
Signal peptidase complex catalytic subunit SEC11A OS=Homo sapiens GN=SEC11A PE=1 SV=1  
Stromal cell-derived factor 2-like protein 1 OS=Homo sapiens GN=SDF2L1 PE=1 SV=2  
GH3 domain-containing protein OS=Homo sapiens GN=GHDC PE=1 SV=2  
Syntaxin-8 OS=Homo sapiens GN=STX8 PE=1 SV=2  
Dolichol-phosphate mannosyltransferase subunit 3 OS=Homo sapiens GN=DPM3 PE=1 SV=2

| Species | Peptide | Lys6   | Lys8    | Organelle |
|---------|---------|--------|---------|-----------|
| HUMAN   | 43      | 1.5147 | 5.0894  | ER        |
| HUMAN   | 33      | 1.6852 | 11.557  | ER        |
| HUMAN   | 25      | 0.9387 | 15.9431 | ER        |
| HUMAN   | 20      | 0.7965 | 2.4845  | ER        |
| HUMAN   | 32      | 1.2142 | 0.8964  | ER        |
| HUMAN   | 19      | 1.0002 | 0.3839  | ER        |
| HUMAN   | 16      | ND     | ND      | ER        |
| HUMAN   | 13      | 1.5868 | 0.3839  | ER        |
| HUMAN   | 24      | 1.0717 | 0.3839  | ER        |
| HUMAN   | 17      | 1.2835 | 27.1939 | ER        |
| HUMAN   | 10      | 1.483  | ND      | ER        |
| HUMAN   | 7       | 0.1393 | 0.3839  | ER        |
| HUMAN   | 9       | 0.9903 | ND      | ER        |
| HUMAN   | 6       | 1.3674 | 21.4636 | ER        |
| HUMAN   | 13      | 0.8023 | 10.6105 | ER        |
| HUMAN   | 7       | ND     | ND      | ER        |
| HUMAN   | 9       | 1.3323 | 11.4973 | ER        |
| HUMAN   | 8       | 1.6828 | ND      | ER        |
| HUMAN   | 6       | 1.1434 | 16.7416 | ER        |
| HUMAN   | 6       | ND     | ND      | ER        |
| HUMAN   | 6       | 1.0487 | 10.9698 | ER        |
| HUMAN   | 6       | ND     | ND      | ER        |
| HUMAN   | 5       | ND     | ND      | ER        |
| HUMAN   | 5       | ND     | ND      | ER        |
| HUMAN   | 5       | ND     | ND      | ER        |
| HUMAN   | 7       | 1.329  | 6.9083  | ER        |
| HUMAN   | 6       | 0.0121 | 0.3839  | ER        |
| HUMAN   | 4       | 1.302  | 7.9807  | ER        |
| HUMAN   | 4       | ND     | ND      | ER        |
| HUMAN   | 2       | ND     | ND      | ER        |
| HUMAN   | 3       | ND     | ND      | ER        |
| HUMAN   | 3       | ND     | ND      | ER        |
| HUMAN   | 2       | ND     | ND      | ER        |
| HUMAN   | 5       | ND     | ND      | ER        |
| HUMAN   | 3       | ND     | ND      | ER        |
| HUMAN   | 2       | 0.0121 | 0.3839  | ER        |
| HUMAN   | 2       | 1.3415 | 0.3839  | ER        |
| HUMAN   | 4       | ND     | ND      | ER        |
| HUMAN   | 4       | ND     | ND      | ER        |
| HUMAN   | 2       | ND     | ND      | ER        |
| HUMAN   | 2       | ND     | ND      | ER        |
| HUMAN   | 2       | 0.7796 | 0.3839  | ER        |
| HUMAN   | 3       | ND     | ND      | ER        |
| HUMAN   | 2       | 2.0374 | ND      | ER        |
| HUMAN   | 2       | ND     | ND      | ER        |
| HUMAN   | 2       | ND     | ND      | ER        |
| HUMAN   | 3       | ND     | ND      | ER        |
| HUMAN   | 3       | ND     | ND      | ER        |
| HUMAN   | 2       | ND     | ND      | ER        |

|       |   |        |         |    |
|-------|---|--------|---------|----|
| HUMAN | 2 | ND     | ND      | ER |
| HUMAN | 3 | ND     | ND      | ER |
| HUMAN | 2 | 1.9573 | 0.3839  | ER |
| HUMAN | 2 | ND     | ND      | ER |
| HUMAN | 3 | ND     | ND      | ER |
| HUMAN | 2 | ND     | ND      | ER |
| HUMAN | 2 | ND     | ND      | ER |
| HUMAN | 2 | 0.0121 | 0.3839  | ER |
| HUMAN | 2 | ND     | ND      | ER |
| HUMAN | 2 | 0.0121 | 0.3839  | ER |
| HUMAN | 2 | ND     | ND      | ER |
| HUMAN | 3 | ND     | ND      | ER |
| HUMAN | 2 | ND     | ND      | ER |
| HUMAN | 2 | 1.2062 | 9.0175  | ER |
| HUMAN | 2 | ND     | ND      | ER |
| HUMAN | 2 | ND     | ND      | ER |
| HUMAN | 1 | 1.2078 | 21.7272 | ER |
| HUMAN | 1 | ND     | ND      | ER |
| HUMAN | 1 | ND     | 100     | ER |
| HUMAN | 1 | ND     | ND      | ER |
| HUMAN | 1 | ND     | 100     | ER |
| HUMAN | 2 | ND     | ND      | ER |
| HUMAN | 3 | ND     | ND      | ER |
| HUMAN | 2 | ND     | ND      | ER |
| HUMAN | 2 | ND     | ND      | ER |
| HUMAN | 1 | ND     | ND      | ER |
| HUMAN | 1 | ND     | ND      | ER |
| HUMAN | 1 | ND     | ND      | ER |
| HUMAN | 1 | 100    | ND      | ER |
| HUMAN | 1 | ND     | ND      | ER |
| HUMAN | 1 | ND     | ND      | ER |
| HUMAN | 2 | ND     | ND      | ER |
| HUMAN | 1 | 0.0114 | 0.1042  | ER |
| HUMAN | 1 | 1.212  | ND      | ER |
| HUMAN | 1 | ND     | 100     | ER |
| HUMAN | 1 | ND     | ND      | ER |
| HUMAN | 1 | ND     | ND      | ER |
| HUMAN | 1 | ND     | ND      | ER |
| HUMAN | 1 | ND     | ND      | ER |
| HUMAN | 1 | ND     | ND      | ER |
| HUMAN | 1 | ND     | ND      | ER |
| HUMAN | 1 | ND     | ND      | ER |
| HUMAN | 1 | ND     | ND      | ER |
| HUMAN | 1 | ND     | ND      | ER |
| HUMAN | 1 | ND     | ND      | ER |
| HUMAN | 1 | ND     | ND      | ER |
| HUMAN | 1 | ND     | ND      | ER |
| HUMAN | 1 | ND     | ND      | ER |
| HUMAN | 1 | 0.0121 | 0.3839  | ER |
| HUMAN | 1 | ND     | ND      | ER |



| LIPID CLASS      | PRECURSOR ION      | MS/MS MODE & CONDITIONS (CE) | FRAGMENT                                |
|------------------|--------------------|------------------------------|-----------------------------------------|
| PG, PA           | [M-H] <sup>-</sup> | PI, m/z 153, -65 V           | Glycerol phosphate derivative           |
| PI               | [M-H] <sup>-</sup> | PI, m/z 241.1, -60 V         | Cyclic inositol phosphate               |
| PIP              | [M-H] <sup>-</sup> | PI, m/z 321.1, -60V          | Phosphoinositol phosphate               |
| PIP <sub>2</sub> | [M-H] <sup>-</sup> | PI, m/z 401.1, -62 V         | Diphosphoinositol phosphate             |
| PS               | [M-H] <sup>-</sup> | NL, m/z 185, 30 V            | Serine                                  |
| PE               | [M-H] <sup>-</sup> | PI, m/z 141, 25 V            | Glycerol phosphoethanolamine derivative |
| PC, SM           | [M-H] <sup>+</sup> | PI, m/z 184.1, 60 V          | Phosphocholine                          |

SUPPLEMENTARY TABLE 2

| Table-S3 Peak area and conversion into concentration of ER phospholipids infected either with H37Ra or H37Rv by shotgun lipidomics method |                      |          |           |                       |                       |           |           |                       |           |                       |          |      |      |         |
|-------------------------------------------------------------------------------------------------------------------------------------------|----------------------|----------|-----------|-----------------------|-----------------------|-----------|-----------|-----------------------|-----------|-----------------------|----------|------|------|---------|
| Peak Area                                                                                                                                 |                      |          |           | Peak Area             |                       |           |           | Peak Area             |           |                       |          |      |      |         |
| H37Ra                                                                                                                                     |                      |          |           | H37Rv                 |                       |           |           | Uninfected (THP-1)    |           |                       |          |      |      |         |
| Name of Phospholipids                                                                                                                     | I                    | II       | III       | Name of Phospholipids | I                     | II        | III       | Name of Phospholipids | I         | II                    | III      |      |      |         |
| PG                                                                                                                                        | 4301842              | 3453380  | 2391753.5 | PG                    | 4207123               | 5359718.9 | 6051295.4 | PG                    | 8464106.2 | 7982341               | 8267342  |      |      |         |
| PA                                                                                                                                        | 2042881              | 1914932  | 1279806   | PA                    | 3383390               | 3833410.3 | 6652224.6 | PA                    | 5841275.6 | 6023521               | 5784516  |      |      |         |
| PI                                                                                                                                        | 3624869              | 4280439  | 847382.4  | PI                    | 2825902               | 6779216.8 | 4475488.8 | PI                    | 26479545  | 23875934              | 25897616 |      |      |         |
| PIP2                                                                                                                                      | 890.3                | 901.2    | 910.2     | PIP2                  | 5738.8                | 5698.2    | 5703.2    | PIP2                  | 1021.1    | 998.3                 | 1002.4   |      |      |         |
| PE                                                                                                                                        | 770987.5             | 769989.3 | 759899.1  | PE                    | 4676556               | 1631887.9 | 242479.9  | PE                    | 2729520.2 | 2698652               | 2703256  |      |      |         |
| PS                                                                                                                                        | 643367.9             | 452969.7 | 427124.9  | PS                    | 590171.9              | 700834.7  | 125500    | PS                    | 688007.9  | 679814.3              | 680414.2 |      |      |         |
| PC                                                                                                                                        | 72609876             | 72662858 | 72643589  | PC                    | 64479785              | 99606619  | 88007999  | PC                    | 37793662  | 37906432              | 37603248 |      |      |         |
| SM                                                                                                                                        | 26959977             | 7170621  | 5172672.1 | SM                    | 5532337               | 9669694.5 | 1001176.8 | SM                    | 2532129.1 | 2505341               | 2499677  |      |      |         |
| Concentration                                                                                                                             |                      |          |           | Concentration         |                       |           |           | Concentration         |           |                       |          |      |      |         |
| H37Ra                                                                                                                                     |                      |          |           | H37Rv                 |                       |           |           | UI                    |           |                       |          |      |      |         |
| nmoles                                                                                                                                    |                      |          |           | nmoles                |                       |           |           | nmoles                |           |                       |          |      |      |         |
| Name of Phospholipids                                                                                                                     | I                    | II       | III       | Average               | Name of Phospholipids | I         | II        | III                   | Average   | Name of Phospholipids | I        | II   | III  | Average |
| PG                                                                                                                                        | 0.05                 | 0.04     | 0.03      | 0.04                  | PG                    | 0.05      | 0.06      | 0.07                  | 0.06      | PG                    | 0.10     | 0.09 | 0.10 | 0.10    |
| PA                                                                                                                                        | 3.05                 | 2.85     | 1.91      | 2.60                  | PA                    | 5.04      | 5.72      | 9.92                  | 6.89      | PA                    | 8.71     | 8.98 | 8.63 | 8.77    |
| PI                                                                                                                                        | 0.02                 | 0.02     | 0.00      | 0.01                  | PI                    | 0.01      | 0.03      | 0.02                  | 0.02      | PI                    | 0.12     | 0.11 | 0.12 | 0.11    |
| PIP2                                                                                                                                      | 0.00                 | 0.00     | 0.00      | 0.00                  | PIP2                  | 0.00      | 0.00      | 0.00                  | 0.00      | PIP2                  | 0.00     | 0.00 | 0.00 | 0.00    |
| PE                                                                                                                                        | 0.00                 | 0.00     | 0.00      | 0.00                  | PE                    | 0.01      | 0.00      | 0.00                  | 0.01      | PE                    | 0.01     | 0.01 | 0.01 | 0.01    |
| PS                                                                                                                                        | 0.04                 | 0.03     | 0.03      | 0.03                  | PS                    | 0.04      | 0.05      | 0.01                  | 0.03      | PS                    | 0.04     | 0.04 | 0.04 | 0.04    |
| PC                                                                                                                                        | 0.05                 | 0.05     | 0.05      | 0.05                  | PC                    | 0.04      | 0.07      | 0.06                  | 0.06      | PC                    | 0.03     | 0.03 | 0.03 | 0.03    |
| SM                                                                                                                                        | 4.69                 | 1.24     | 0.90      | 2.28                  | SM                    | 0.96      | 1.68      | 0.17                  | 0.94      | SM                    | 0.44     | 0.44 | 0.43 | 0.44    |
| Name of Standard phospholipids                                                                                                            | Run at Concentration |          | Peak Area |                       |                       |           |           |                       |           |                       |          |      |      |         |
| PG                                                                                                                                        | 1uM                  |          | 3600000   |                       |                       |           |           |                       |           |                       |          |      |      |         |
| PA                                                                                                                                        | 1uM                  |          | 28000     |                       |                       |           |           |                       |           |                       |          |      |      |         |
| PI                                                                                                                                        | 1uM                  |          | 9300000   |                       |                       |           |           |                       |           |                       |          |      |      |         |
| PIP2                                                                                                                                      | 20uM                 |          | 30000000  |                       |                       |           |           |                       |           |                       |          |      |      |         |
| PE                                                                                                                                        | 1uM                  |          | 16000000  |                       |                       |           |           |                       |           |                       |          |      |      |         |
| PS                                                                                                                                        | 1uM                  |          | 640000    |                       |                       |           |           |                       |           |                       |          |      |      |         |
| PC                                                                                                                                        | 1uM                  |          | 61000000  |                       |                       |           |           |                       |           |                       |          |      |      |         |
| SM                                                                                                                                        | 0.5uM                |          | 120000    |                       |                       |           |           |                       |           |                       |          |      |      |         |

Supplementary Table-3



### Supplementary Table-4 : PCR primers used for mRNA expression analysis

| Primers | Sequence                                            | Product size |
|---------|-----------------------------------------------------|--------------|
| CANX    | F- ATGGATGGGGCCTGAAGAAA<br>R- CCTCTTCCTTCACATCCGGT  | 225          |
| PDIA4   | F- CGCGAGTTTGTCACTGCTTTC<br>R- CGTCCTTCTTGGGGTCCATC | 141          |
| ERLN2   | F- CTTGTGGGACTAGTGGTGGT<br>R-TGGTTCAGTTCGTGGTGGAT   | 154          |
